# Supplementary material for: Comparison of Mitochondrial Mutation Spectra in Ageing Human Colonic Epithelium and Disease: Absence of Evidence for Purifying Selection in Somatic Mitochondrial DNA Point Mutations
Source: PLoS Genet. 2012 Nov 15;8(11):e1003082. doi: 10.1371/journal.pgen.1003082 (PMC3499406; doi:10.1371/journal.pgen.1003082)
Supplement: Table S4 — Somatic mitochondrial DNA point mutations reported in ageing human tissues. (XLSX) [file pgen.1003082.s004.xlsx]

## Sheet: Sheet1
Reference	Tissue	Gene	Position	Base Change	Mutation Level	Amino Acid Change	MutPred Pathogenicity Score	Cytochrome c Oxidase Histochemistry
Blackwood et al. 2011	Prostatic Epithelium	MT-COI	5989	T>C	1	p.L29P	0.814	Negative
Blackwood et al. 2011	Prostatic Epithelium	MT-COI	7219	G>A	1	p.R439H	0.826	Negative
Blackwood et al. 2011	Prostatic Epithelium	MT-COI	6640	T>C	0.8	p.L246P	0.772	Negative
Blackwood et al. 2011	Prostatic Epithelium	MT-RNR1	1574	G>A	1	~		Negative
Blackwood et al. 2011	Prostatic Epithelium	MT-TL1	3585	T>C	1	~		Negative
Blackwood et al. 2011	Prostatic Epithelium	MT-TM	4409	T>C	1	~		Negative
Blackwood et al. 2011	Prostatic Epithelium	MT-TS1	7475	G>A	0.3	~		Negative
De Alwis et al. 2009	Liver	MT-TD	7540	T>C	Not Stated	~		Negative
De Alwis et al. 2009	Liver	MT-COII	7792	C>G	Not Stated	Synonymous		Negative
De Alwis et al. 2009	Liver	MT-COII	7794	C>T	Not Stated	p.A70V	0.847	Negative
Fellous et al. 2009(a)	Liver	MT-COI	6301	C>T	Not Stated	p.A133V	0.784	Negative
Fellous et al. 2009(a)	Liver	MT-TD	7570	A>G	Not Stated	~		Negative
Fellous et al. 2009(b)	Pancreas	MT-ND1	4098	A>G	Not Stated	Synonymous		Negative
Fellous et al. 2009(b)	Liver	MT-RNR1	2585	G>A	Not Stated	~		Negative
Gaisa et al. 2011	Bladder Urothelium	MT-COI	7273	G>A	Not Stated	p.G457D	0.833	Negative
Gaisa et al. 2011	Bladder Urothelium	MT-COI	6762	G>A	Not Stated	p.V287M	0.82	Negative
Gaisa et al. 2011	Bladder Urothelium	MT-RNR1	902	G>A	Not Stated	~		Negative
Gaisa et al. 2011	Bladder Urothelium	MT-RNR2	1704	T>C	Not Stated	~		Negative
Gaisa et al. 2011	Bladder Urothelium	MT-RNR2	2815	G>A	Not Stated	~		Negative
Gutierrez-Gonzales et al. 2009	Small Intestine	MT-COI	6692	A DEL	Not Stated	~		Negative
Gutierrez-Gonzales et al. 2009	Small Intestine	MT-RNR1	879	T>C	Not Stated	~		Negative
McDonald et al. 2008	Stomach	MT-ATP8	8503	T>C	Not Stated	Synonymous		Negative
McDonald et al. 2008	Stomach	MT-COII	8181	T>C	Not Stated	p.I199T	0.791	Negative
McDonald et al. 2008	Stomach	MT-RNR2	2593	A>G	Not Stated	~		Negative
References
	Blackwood et al. 2011	Blackwood JK, Williamson SC, Greaves LC, Wilson L, Rigas AC, et al. (2011) J Pathol 225: 181-188.
	De Alwis et al. 2009	De Alwis N, Hudson G, Burt AD, Day CP, Chinnery PF (2009) Hepatology 50: 992-993
	Fellous et al. 2009(a)	Fellous TG, Islam S, Tadrous PJ, Elia G, Kocher HM, et al. (2009) Hepatology 49: 1655-1663.
	Fellous et al. 2009(b)	Fellous TG, McDonald SA, Burkert J, Humphries A, Islam S, et al. (2009) Stem Cells 27: 1410-1420.
	Gaisa et al. 2011	Gaisa NT, Graham TA, McDonald SA, Canadillas-Lopez S, Poulsom R, et al. (2011) . J Pathol 225: 163-171.
	Gutierrez-Gonzales et al. 2009	Gutierrez-Gonzalez L, Deheragoda M, Elia G, Leedham SJ, Shankar A, et al. (2009) J Pathol 217: 489-496.
	McDonald et al. 2008	McDonald SA, Greaves LC, Gutierrez-Gonzalez L, Rodriguez-Justo M, Deheragoda M, et al. (2008) Gastroenterology 134: 500-510.
